# Supplementary material for: Gestational Dating by Urine Metabolic Profile at High Resolution Weekly Sampling Timepoints: Discovery and Validation
Source: Frontiers journal article supplement (doi:10.3389/fmmed.2022.844280), 2022-04-27
Supplement: Data_Sheet_1.PDF [file Data_Sheet_1.PDF]

## *Supplementary Material*

**Supplemental Table 1. Patient characteristics shared by both California and Alabama cohorts**

| Characteristic                                           | California Cohort | Alabama Cohort   |
|----------------------------------------------------------|-------------------|------------------|
|                                                          | Full-term (n=19)  | Full-term (n=10) |
| Age, mean(SD)                                            | 32.2 (4.7)        | 26.(4.9)         |
| GA @ Del, mean(SD)                                       | 39.5 (1.2)        | 38.2 (1.2)       |
| Days, mean(SD)                                           | 2.9 (2.1)         | 2.4 (2.2)        |
| Type of Membrane Rupture, N(%)                           |                   |                  |
| AROM                                                     | 11 (57.9)         | 6 (60)           |
| SROM                                                     | 8 (42.1)          | 4 (40)           |
| How did labor begin?, N(%)                               |                   |                  |
| Augmented                                                | 3 (15.8)          | 3 (30)           |
| Induced                                                  | 5 (26.3)          | 4 (40)           |
| Spontaneous                                              | 9 (47.4)          | 3 (30)           |
| SROM w/o contractions                                    | 1 (5.3)           | 0 (0)            |
| NA                                                       | 1 (5.3)           | 0 (0)            |
| Mode of delivery, N(%)                                   |                   |                  |
| Cesarean                                                 | 6 (31.6)          | 0 (0)            |
| NSVD                                                     | 12 (63.2)         | 10 (100)         |
| Operative Vaginal delivery                               | 1 (5.3)           | 0 (0)            |
| Presentation @ Del, Vertex/cephalic                      | 19 (100)          | 10 (100)         |
| Beta blocker Use, No                                     | 19 (100)          | 10 (100)         |
| GBS, N(%)                                                |                   |                  |
| Negative                                                 | 16 (84.2)         | 7 (70)           |
| Positive                                                 | 3 (15.8)          | 3 (30)           |
| Blood loss (>500mL for NSVD; >1,000mL for cesarean, N(%) |                   |                  |
| No                                                       | 17 (89.5)         | 10 (100)         |
| Yes                                                      | 2 (10.5)          | 0 (0)            |
| Transfusion, N(%)                                        |                   |                  |

|                                         |                  |                  |
|-----------------------------------------|------------------|------------------|
| No                                      | 18 (94.7)        | 10 (100)         |
| Yes                                     | 1 (5.3)          | 0 (0)            |
| <b>Antibiotic use, N(%)</b>             |                  |                  |
| No                                      | 12 (63.2)        | 7 (70)           |
| Yes                                     | 7 (36.8)         | 3 (30)           |
| <b>Preg Type, N(%)</b>                  |                  |                  |
| IVF                                     | 1 (5.3)          | 0 (0)            |
| Spontaneous                             | 18 (94.7)        | 9 (90)           |
| NA                                      | 0 (0)            | 1 (10)           |
| <b>Race, N(%)</b>                       |                  |                  |
| White                                   | 19 (100)         | 0 (0)            |
| Black                                   | 0 (0)            | 10 (100)         |
| <b>Ethnicity, Non-hispanic</b>          | 19 (100)         | 10 (100)         |
| <b>BMI, median(IQR)</b>                 | 21.8 (20.2,24.7) | 29.8 (26.6,32.5) |
| <b>highest level of education, N(%)</b> |                  |                  |
| Bachelor/undergraduate degree           | 5 (26.3)         | 0 (0)            |
| High School diploma or equivalent (GED) | 0 (0)            | 3 (30)           |
| No high school (8th grade or less)      | 0 (0)            | 1 (10)           |
| Post-undergraduate degree               | 12 (63.2)        | 0 (0)            |
| Post-undergraduate degree/PhD           | 2 (10.5)         | 0 (0)            |
| Some college                            | 0 (0)            | 4 (40)           |
| Some high school                        | 0 (0)            | 2 (20)           |
| <b>Smoker, N(%)</b>                     |                  |                  |
| No                                      | 19 (100)         | 8 (80)           |
| Yes                                     | 0 (0)            | 2 (20)           |
| <b>Prev Pregs, median(IQR)</b>          | 1 (0,2)          | 3 (1,4)          |
| <b>Hx of PTB, N(%)</b>                  |                  |                  |
| NO                                      | 16 (84.2)        | 1 (10)           |
| YES                                     | 3 (15.8)         | 9 (90)           |
| <b>Progest Use, N(%)</b>                |                  |                  |
| YES                                     | 1 (5.3)          | 10 (100)         |
| NA                                      | 18 (94.7)        | 0 (0)            |
| <b>Mom Hgt (cm), mean(SD)</b>           | 166.9 (6.2)      | 162.9 (3)        |
| <b>Hx of PE, N(%)</b>                   |                  |                  |

|                                          |           |          |
|------------------------------------------|-----------|----------|
| No                                       | 19 (100)  | 0 (0)    |
| <b>Chorioamnionitis, N(%)</b>            |           |          |
| No                                       | 17 (89.5) | 10 (100) |
| Yes                                      | 2 (10.5)  | 0 (0)    |
| <b>Endometritis, N(%)</b>                |           |          |
| No                                       | 18 (94.7) | 10 (100) |
| Yes                                      | 1 (5.3)   | 0 (0)    |
| <b>Autoimmune Disorder, N(%)</b>         |           |          |
| No                                       | 18 (94.7) | 10 (100) |
| Yes                                      | 1 (5.3)   | 0 (0)    |
| <b>Multiple UTI, N(%)</b>                |           |          |
| No                                       | 17 (89.5) | 10 (100) |
| Yes                                      | 2 (10.5)  | 0 (0)    |
| <b>Psychiatric Dx (depression), N(%)</b> |           |          |
| No                                       | 17 (89.5) | 9 (90)   |
| Yes                                      | 2 (10.5)  | 1 (10)   |
| <b>Thyroid Dx, N(%)</b>                  |           |          |
| No                                       | 18 (94.7) | 10 (100) |
| Yes                                      | 1 (5.3)   | 0 (0)    |
| <b>Asthma, N(%)</b>                      |           |          |
| No                                       | 18 (94.7) | 9 (90)   |
| Yes                                      | 1 (5.3)   | 1 (10)   |
| <b>Cancer, N(%)</b>                      |           |          |
| No                                       | 18 (94.7) | 10 (100) |
| Yes                                      | 1 (5.3)   | 0 (0)    |
| <b>Epilepsy, N(%)</b>                    |           |          |
| No                                       | 19 (100)  | 9 (90)   |
| Yes                                      | 0 (0)     | 1 (10)   |
| <b>Breast Dx, No</b>                     | 19 (100)  | 10 (100) |
| <b>Gynecol surgery, N(%)</b>             |           |          |
| No                                       | 14 (73.7) | 10 (100) |
| Yes                                      | 5 (26.3)  | 0 (0)    |
| <b>HTN, N(%)</b>                         |           |          |
| No                                       | 19 (100)  | 9 (90)   |

|                                          |                   |                         |
|------------------------------------------|-------------------|-------------------------|
| <b>Yes</b>                               | <b>0 (0)</b>      | <b>1 (10)</b>           |
| <b>Gest HTN, N(%)</b>                    |                   |                         |
| <b>Mild gHTN</b>                         | <b>1 (5.3)</b>    | <b>0 (0)</b>            |
| <b>No</b>                                | <b>11 (57.9)</b>  | <b>0 (0)</b>            |
| <b>NA</b>                                | <b>7 (36.8)</b>   | <b>10 (100)</b>         |
| <b>EtOH, N(%)</b>                        |                   |                         |
| <b>No</b>                                | <b>18 (94.7)</b>  | <b>10 (100)</b>         |
| <b>Yes</b>                               | <b>1 (5.3)</b>    | <b>0 (0)</b>            |
| <b>Recreational Drug Use, N(%)</b>       |                   |                         |
| <b>No</b>                                | <b>19 (100)</b>   | <b>9 (90)</b>           |
| <b>Yes</b>                               | <b>0 (0)</b>      | <b>1 (10)</b>           |
| <b>Sex, N(%)</b>                         | <b>0 (0)</b>      |                         |
| <b>Female</b>                            | <b>8 (42.1)</b>   | <b>5 (50)</b>           |
| <b>Male</b>                              | <b>11 (57.9)</b>  | <b>5 (50)</b>           |
| <b>Wgt at Birth (kg), mean(SD)</b>       | <b>3.4 (0.3)</b>  | <b>3.1 (0.5)</b>        |
| <b>Length at birth (cm), median(IQR)</b> | <b>51 (50,53)</b> | <b>49.5 (46.8,50.6)</b> |

**Supplemental Table 2A. Patient characteristics of California cohort.**

| Characteristic                                           | California Cohort |
|----------------------------------------------------------|-------------------|
|                                                          | Full-term (n=19)  |
| Age, mean(SD)                                            | 32.2 (4.7)        |
| GA @ Del, mean(SD)                                       | 39.5 (1.2)        |
| Days, mean(SD)                                           | 2.9 (2.1)         |
| Type of Membrane Rupture, N(%)                           |                   |
| AROM                                                     | 11 (57.9)         |
| SROM                                                     | 8 (42.1)          |
| How did labor begin?, N(%)                               |                   |
| Augmented                                                | 3 (15.8)          |
| Induced                                                  | 5 (26.3)          |
| Spontaneous                                              | 9 (47.4)          |
| SROM w/o contractions                                    | 1 (5.3)           |
| NA                                                       | 1 (5.3)           |
| Mode of delivery, N(%)                                   |                   |
| Cesarean                                                 | 6 (31.6)          |
| NSVD                                                     | 12 (63.2)         |
| Operative Vaginal delivery                               | 1 (5.3)           |
| Presentation @ Del, Vertex/cephalic                      | 19 (100)          |
| Beta blocker Use, No                                     | 19 (100)          |
| GBS, N(%)                                                |                   |
| Negative                                                 | 16 (84.2)         |
| Positive                                                 | 3 (15.8)          |
| Blood loss (>500mL for NSVD; >1,000mL for cesarean, N(%) |                   |
| No                                                       | 17 (89.5)         |
| Yes                                                      | 2 (10.5)          |
| Transfusion, N(%)                                        |                   |
| No                                                       | 18 (94.7)         |
| Yes                                                      | 1 (5.3)           |
| Antibiotic use, N(%)                                     |                   |
| No                                                       | 12 (63.2)         |

|                                                |                         |
|------------------------------------------------|-------------------------|
| <b>Yes</b>                                     | <b>7 (36.8)</b>         |
| <b>Preg Type, N(%)</b>                         |                         |
| <b>IVF</b>                                     | <b>1 (5.3)</b>          |
| <b>Spontaneous</b>                             | <b>18 (94.7)</b>        |
| <b>Race, N(%)</b>                              |                         |
| <b>White</b>                                   | <b>19 (100)</b>         |
| <b>Ethnicity, Non-hispanic</b>                 | <b>19 (100)</b>         |
| <b>BMI, median(IQR)</b>                        | <b>21.8 (20.2,24.7)</b> |
| <b>highest level of education, N(%)</b>        |                         |
| <b>Bachelor/undergraduate degree</b>           | <b>5 (26.3)</b>         |
| <b>High School diploma or equivalent (GED)</b> | <b>0 (0)</b>            |
| <b>No high school (8th grade or less)</b>      | <b>0 (0)</b>            |
| <b>Post-undergraduate degree</b>               | <b>12 (63.2)</b>        |
| <b>Post-undergraduate degree/PhD</b>           | <b>2 (10.5)</b>         |
| <b>Smoker, N(%)</b>                            |                         |
| <b>No</b>                                      | <b>19 (100)</b>         |
| <b>Prev Pregs, median(IQR)</b>                 | <b>1 (0,2)</b>          |
| <b>Hx of PTB, N(%)</b>                         |                         |
| <b>NO</b>                                      | <b>16 (84.2)</b>        |
| <b>YES</b>                                     | <b>3 (15.8)</b>         |
| <b>Progest Use, N(%)</b>                       |                         |
| <b>NA</b>                                      | <b>18 (94.7)</b>        |
| <b>YES</b>                                     | <b>1 (5.3)</b>          |
| <b>Mom Hgt (cm), mean(SD)</b>                  | <b>166.9 (6.2)</b>      |
| <b>Mom Wgt (kg), median(IQR)</b>               | <b>61 (57,66.7)</b>     |
| <b>Hx of PE, N(%)</b>                          |                         |
| <b>No</b>                                      | <b>19 (100)</b>         |
| <b>Chorioamnionitis, N(%)</b>                  |                         |
| <b>No</b>                                      | <b>17 (89.5)</b>        |
| <b>Yes</b>                                     | <b>2 (10.5)</b>         |
| <b>Endometritis, N(%)</b>                      |                         |
| <b>No</b>                                      | <b>18 (94.7)</b>        |
| <b>Yes</b>                                     | <b>1 (5.3)</b>          |

|                                          |           |
|------------------------------------------|-----------|
| <b>Autoimmune Disorder, N(%)</b>         |           |
| No                                       | 18 (94.7) |
| Yes                                      | 1 (5.3)   |
| <b>Multiple UTI, N(%)</b>                |           |
| No                                       | 17 (89.5) |
| Yes                                      | 2 (10.5)  |
| <b>Psychiatric Dx (depression), N(%)</b> |           |
| No                                       | 17 (89.5) |
| Yes                                      | 2 (10.5)  |
| <b>Thyroid Dx, N(%)</b>                  |           |
| No                                       | 18 (94.7) |
| Yes                                      | 1 (5.3)   |
| <b>Asthma, N(%)</b>                      |           |
| No                                       | 18 (94.7) |
| Yes                                      | 1 (5.3)   |
| <b>Cancer, N(%)</b>                      |           |
| No                                       | 18 (94.7) |
| Yes                                      | 1 (5.3)   |
| <b>Epilepsy, N(%)</b>                    |           |
| No                                       | 19 (100)  |
| Yes                                      | 0 (0)     |
| <b>Breast Dx, No</b>                     |           |
|                                          | 19 (100)  |
| <b>Gynecol surgery, N(%)</b>             |           |
| No                                       | 14 (73.7) |
| Yes                                      | 5 (26.3)  |
| <b>HTN, N(%)</b>                         |           |
| No                                       | 19 (100)  |
| <b>Gest HTN, N(%)</b>                    |           |
| Mild gHTN                                | 1 (5.3)   |
| No                                       | 11 (57.9) |
| NA                                       | 7 (36.8)  |
| <b>EtOH, N(%)</b>                        |           |
| No                                       | 18 (94.7) |
| Yes                                      | 1 (5.3)   |

|                                          |                   |
|------------------------------------------|-------------------|
| <b>Recreational Drug Use, N(%)</b>       |                   |
| <b>No</b>                                | <b>19 (100)</b>   |
| <b>Sex, N(%)</b>                         | <b>0 (0)</b>      |
| <b>Female</b>                            | <b>8 (42.1)</b>   |
| <b>Male</b>                              | <b>11 (57.9)</b>  |
| <b>Wgt at Birth (kg), mean(SD)</b>       | <b>3.4 (0.3)</b>  |
| <b>Length at birth (cm), median(IQR)</b> | <b>51 (50,53)</b> |



**Supplemental Table 2B. Patient characteristics of Alabama cohort.**

| <b>Characteristic</b>                                    | <b>Alabama Cohort</b>   |
|----------------------------------------------------------|-------------------------|
|                                                          | <b>Full-term (n=10)</b> |
| Age, mean(SD)                                            | 26.1 (4.9)              |
| GA @ Del, mean(SD)                                       | 38.2 (1.2)              |
| Days, mean(SD)                                           | 2.4 (2.2)               |
| Type of Membrane Rupture, N(%)                           |                         |
| AROM                                                     | 6 (60)                  |
| SROM                                                     | 4 (40)                  |
| How did labor begin?, N(%)                               |                         |
| Augmented                                                | 3 (30)                  |
| Induced                                                  | 4 (40)                  |
| Spontaneous                                              | 0 (0)                   |
| SROM w/o contractions                                    | 3 (30)                  |
| NA                                                       | 0 (0)                   |
| Mode of delivery, N(%)                                   |                         |
| Cesarean                                                 | 0 (0)                   |
| NSVD                                                     | 10 (100)                |
| Operative Vaginal delivery                               | 0 (0)                   |
| Presentation @ Del, Vertex/cephalic                      | 10 (100)                |
| Beta blocker Use, No                                     | 10 (100)                |
| GBS, N(%)                                                |                         |
| Negative                                                 | 7 (70)                  |
| Positive                                                 | 3 (30)                  |
| Blood loss (>500mL for NSVD; >1,000mL for cesarean, N(%) |                         |
| No                                                       | 10 (100)                |
| Yes                                                      | 0 (0)                   |
| Transfusion, N(%)                                        |                         |
| No                                                       | 10 (100)                |
| Yes                                                      | 0 (0)                   |

|                                                |                  |
|------------------------------------------------|------------------|
| <b>Antibiotic use, N(%)</b>                    |                  |
| No                                             | 7 (70)           |
| Yes                                            | 3 (30)           |
| <b>Preg Type, N(%)</b>                         |                  |
| Spontaneous                                    | 9 (90)           |
| NA                                             | 1 (10)           |
| <b>Race, N(%)</b>                              |                  |
| Black                                          | 10 (100)         |
| <b>Ethnicity, Non-hispanic</b>                 | 10 (100)         |
| <b>BMI, median(IQR)</b>                        | 29.8 (26.6,32.5) |
| <b>highest level of education, N(%)</b>        |                  |
| <b>High School diploma or equivalent (GED)</b> | 3 (30)           |
| No high school (8th grade or less)             | 1 (10)           |
| Some college                                   | 4 (40)           |
| Some high school                               | 2 (20)           |
| <b>Smoker, N(%)</b>                            |                  |
| No                                             | 8 (80)           |
| Yes                                            | 2 (20)           |
| <b>Prev Pregs, median(IQR)</b>                 | 3 (1,4)          |
| <b>Hx of PTB, N(%)</b>                         |                  |
| NO                                             | 1 (10)           |
| YES                                            | 9 (90)           |
| <b>Progest Use, N(%)</b>                       |                  |
| YES                                            | 10 (100)         |
| <b>Mom Hgt (cm), mean(SD)</b>                  | 162.9 (3)        |
| <b>Mom Wgt (kg), median(IQR)</b>               | 78.8 (67.5,88)   |
| <b>Hx of PE, N(%)</b>                          |                  |
| NA                                             | 10 (100)         |
| <b>Chorioamnionitis, N(%)</b>                  |                  |

|                                          |          |
|------------------------------------------|----------|
| No                                       | 10 (100) |
| <b>Endometritis, N(%)</b>                |          |
| No                                       | 10 (100) |
| <b>Autoimmune Disorder, N(%)</b>         |          |
| No                                       | 10 (100) |
| <b>Multiple UTI, N(%)</b>                |          |
| No                                       | 10 (100) |
| <b>Psychiatric Dx (depression), N(%)</b> |          |
| No                                       | 9 (90)   |
| Yes                                      | 1 (10)   |
| <b>Thyroid Dx, N(%)</b>                  |          |
| No                                       | 10 (100) |
| <b>Asthma, N(%)</b>                      |          |
| No                                       | 9 (90)   |
| Yes                                      | 1 (10)   |
| <b>Cancer, N(%)</b>                      |          |
| No                                       | 10 (100) |
| <b>Epilepsy, N(%)</b>                    |          |
| No                                       | 9 (90)   |
| Yes                                      | 1 (10)   |
| <b>Breast Dx, No</b>                     | 10 (100) |
| <b>Gynecol surgery, N(%)</b>             |          |
| No                                       | 10 (100) |
| <b>HTN, N(%)</b>                         |          |
| No                                       | 9 (90)   |
| Yes                                      | 1 (10)   |
| <b>Gest HTN, N(%)</b>                    |          |
| NA                                       | 10 (100) |
| <b>EtOH, N(%)</b>                        |          |
| No                                       | 10 (100) |
| <b>Recreational Drug Use, N(%)</b>       |          |
| No                                       | 9 (90)   |
| Yes                                      | 1 (10)   |
| <b>Sex, N(%)</b>                         | 0 (0)    |

|                                          |                         |
|------------------------------------------|-------------------------|
| <b>Female</b>                            | <b>5 (50)</b>           |
| <b>Male</b>                              | <b>5 (50)</b>           |
| <b>Wgt at Birth (kg), mean(SD)</b>       | <b>3.1 (0.5)</b>        |
| <b>Length at birth (cm), median(IQR)</b> | <b>49.5 (46.8,50.6)</b> |

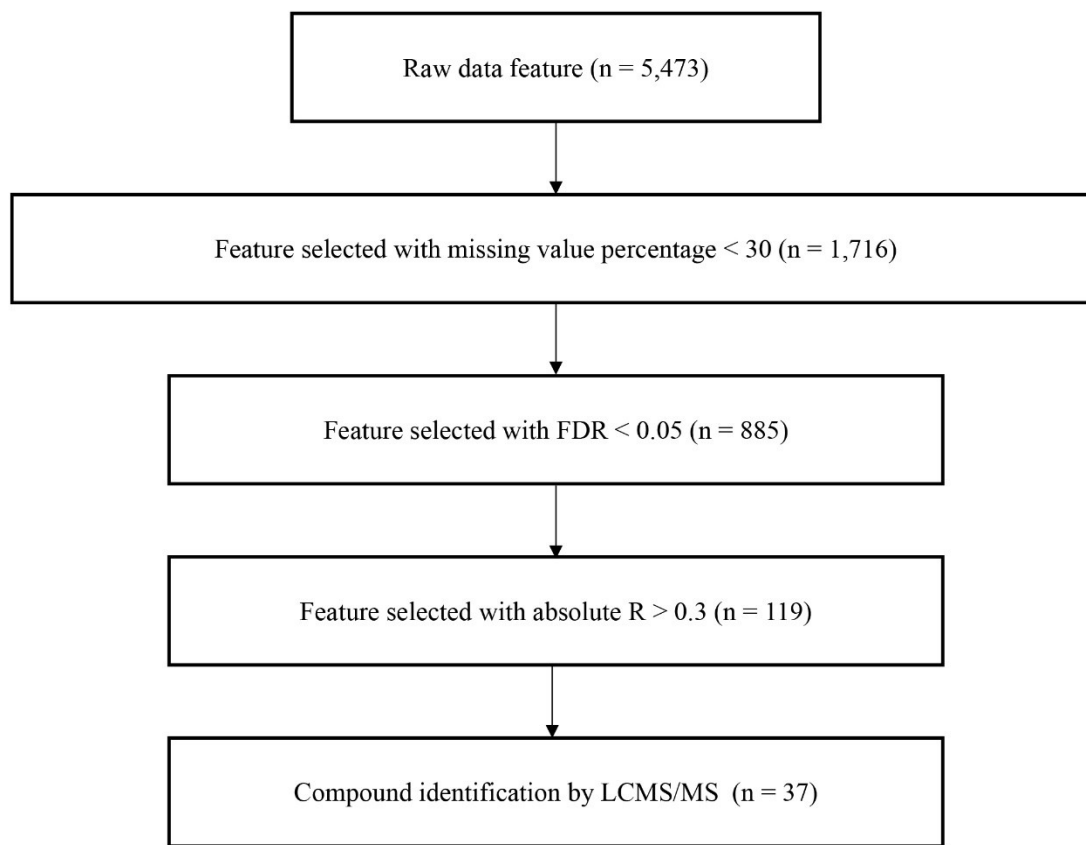

**Supplementary Figure 1. Data preprocessing and feature reduction.** A total of 5,473 metabolic features were identified by LC-MS-based untargeted metabolomics. Of these, 1,716 features were selected with missing value percentage less than 30% across all samples. 119 features were selected based on FDR and Pearson's screening. Finally, 37 compounds were annotated.

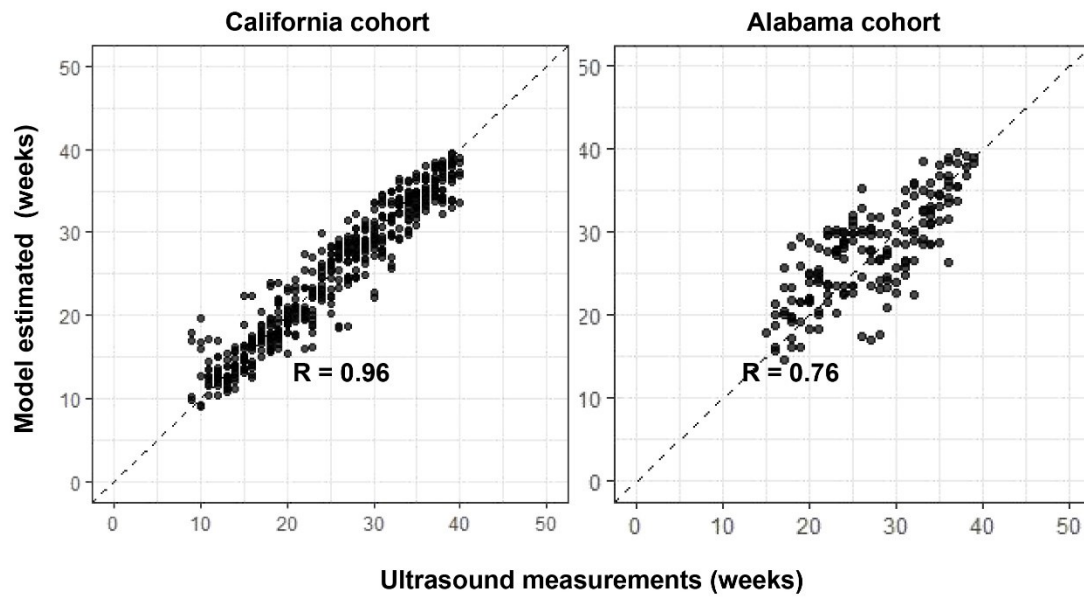

**Supplementary Figure 2. A pathway-based model to estimate GA.** X axis: GA measured by ultrasound at the first trimester. Y axis: model estimation. R: Pearson's correlation coefficient. Left: California cohort; Right: Alabama cohort.

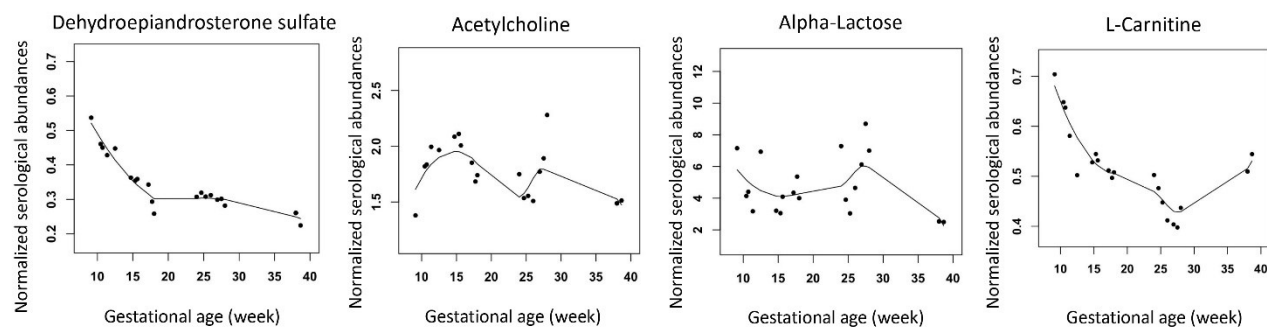

**Supplementary Figure 3. Profile of dehydroepiandrosterone sulfate, acetylcholine,  $\alpha$ -lactose, and L-carnitine in maternal serum over the course of gestation on the California cohort. Loess regression lines were plotted.**

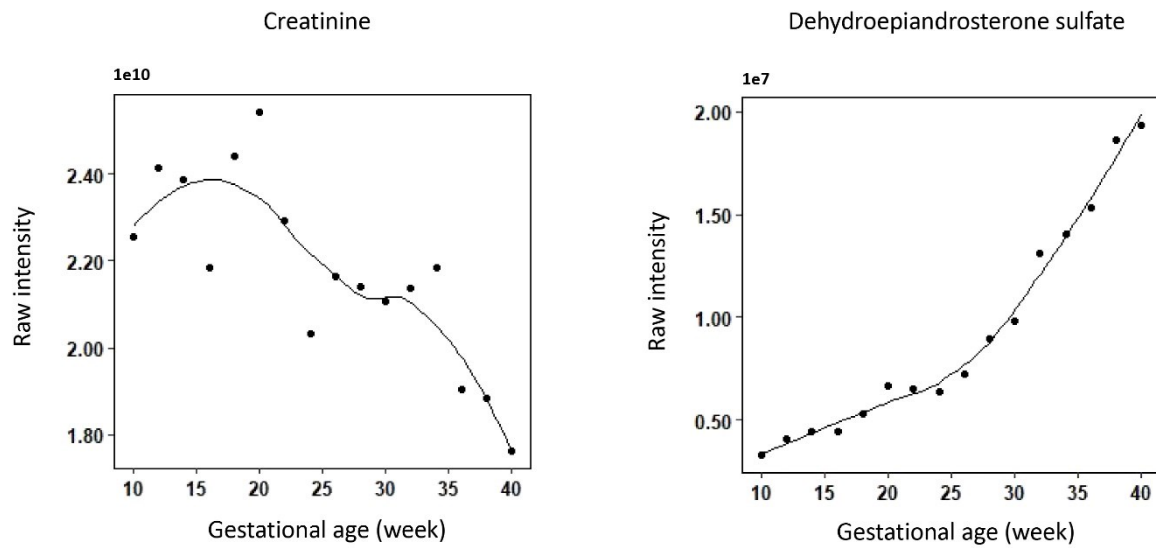

**Supplementary Figure 4. Intensity of creatinine (left) and dehydroepiandrosterone sulfate (right) in urine over the course of gestation on California cohort. Mean  $\pm$  standard error of the mean at each time point was plotted.**
